# Supplementary material for: ViSHWaS: Violence Study of Healthcare Workers and Systems—a global survey
Source: PubMed Central journal article supplement — BMJ Glob Health. 2023 Sep 11;8(9):e013101. doi: 10.1136/bmjgh-2023-013101 (PMC10496720; doi:10.1136/bmjgh-2023-013101), 2023-09-11
Supplement: bmjgh-2023-013101supp001.pdf [file bmjgh-2023-013101supp001.pdf]

## APPENDIX A: Violence Study of Healthcare Workers and Systems (ViSHWaS) Country-wise Collaborative Co-Author List.

| Country Name                 | Count (N = 5405) | Names                                                                                                                                                                                                                                                                                                                                                                                    |
|------------------------------|------------------|------------------------------------------------------------------------------------------------------------------------------------------------------------------------------------------------------------------------------------------------------------------------------------------------------------------------------------------------------------------------------------------|
| India                        | 656              | Rahul Kashyap, Akshat Banga, Umme Habiba Faisal, Tanya Amal, Gaurang Bhatt, Ayushi Mendiratta, Piyush Garg, Harsha Pattnaik, Alisha Lakhani, L V Simhachalam Kutikuppala, Bhaswanth Bollu, Divya Randhawa, Rakhtan Qasba                                                                                                                                                                 |
| USA                          | 395              | Rahul Kashyap, Salim Surani, Ramesh Pandit, Trupti Pandit, Ramesh Adhikari, Ayesha Khalid, Ayushi Mendiratta, Tanya Amal, Akshat Banga, Ravina Verma, Kush Shah, John Counsell, Naresh Dasari, Melissa Schlenker, PratikKumar Vekaria, Taru Dutt, Raghavendra Tirupathi, Raghu Gandhi, Gowthami Sai Kogilathota Jagirdhar, Nancy Nagib, Vikas Bansal, Pranjal Sharma, Benjamin Schlenker |
| Venezuela                    | 168              | Genesis Camacho-Leon, Hans Mautong                                                                                                                                                                                                                                                                                                                                                       |
| Pakistan                     | 154              | Aisha Khalid, Umme Habiba Faisal, Salim Surani, Faizan Ahmad, Taha Mansoor, Piyush Garg                                                                                                                                                                                                                                                                                                  |
| Algeria                      | 127              | Mohammed Amir Rais                                                                                                                                                                                                                                                                                                                                                                       |
| Argentina                    | 120              | Ivan Huespe, Aisha Khalid                                                                                                                                                                                                                                                                                                                                                                |
| Democratic republic of Congo | 119              | Pierre Ciza N, Gaurang Bhatt                                                                                                                                                                                                                                                                                                                                                             |
| Ecuador                      | 118              | Hans Mautong, Leydi del Pilar Lema Lema                                                                                                                                                                                                                                                                                                                                                  |
| Australia                    | 108              | Aisha Khalid                                                                                                                                                                                                                                                                                                                                                                             |
| Guatemala                    | 106              | Nimsi Barrios, Gaurang Bhatt                                                                                                                                                                                                                                                                                                                                                             |
| Peru                         | 106              | Kelly Meza, Gaurang Bhatt                                                                                                                                                                                                                                                                                                                                                                |
| Nigeria                      | 104              | Susan Sheila, Bello Saifullah Muhammad, Gaurang Bhatt, Barakat Kolawole                                                                                                                                                                                                                                                                                                                  |
| Uganda                       | 103              | Amuza Dhabuliwo, Gaurang Bhatt                                                                                                                                                                                                                                                                                                                                                           |
| Nepal                        | 102              | Umme Habiba Faisal, L V Simhachalam Kutikuppala, Piyush Garg                                                                                                                                                                                                                                                                                                                             |
| Cyprus                       | 101              | Hafeez Hamza, Rahul Kashyap                                                                                                                                                                                                                                                                                                                                                              |
| Afghanistan                  | 100              | Mohammad Yasir Essar, Arash Nemat                                                                                                                                                                                                                                                                                                                                                        |
| Saudi Arabia                 | 88               | Razan Alamoudi                                                                                                                                                                                                                                                                                                                                                                           |
| Honduras                     | 78               | Gaurang Bhatt, Keidy Zamora                                                                                                                                                                                                                                                                                                                                                              |
| South Korea                  | 78               | Joanna Lee                                                                                                                                                                                                                                                                                                                                                                               |
| Bangladesh                   | 76               | Bikona Ghosh, Rakhtan Qasba, L V Simhachalam Kutikuppala                                                                                                                                                                                                                                                                                                                                 |

|              |    |                                                            |
|--------------|----|------------------------------------------------------------|
| Egypt        | 76 | Sama Soliman, Zainab Ayoob                                 |
| Jordan       | 75 | Lina Almahmoud, Mohammed Amir Rais                         |
| Indonesia    | 69 | Daniel Martin Simadibrata, Faisal Nawaz                    |
| Sudan        | 67 | Dohha Mohammed                                             |
| Morocco      | 65 | Mohammed Amir Rais                                         |
| Dominica     | 61 | Oyindamola Obadare, Kelly Meza, Gaurang Bhatt,             |
| Philippines  | 61 | Tanya Amal, Era Mae Ramirez                                |
| Kuwait       | 59 | Kalloush shahed, Mohammed Yasir Essar                      |
| Syria        | 59 | Sarya Swed, Mohammed Amir Rais, Temaa Alklani              |
| Bahrain      | 56 | Zainab Ayoob, Mohammed Amir Rais, Tanya Amal               |
| Somalia      | 56 | Ishimwe Florent, Gaurang Bhatt                             |
| Tanzania     | 56 | Goodluck Nehasi, Faisal Nawaz                              |
| Singapore    | 55 | Daren Poh Kiat How, Faisal Nawaz                           |
| Libya        | 54 | Mohamed Elfagieh                                           |
| UAE          | 54 | Faisal Nawaz, Mariam Elsaban                               |
| Yemen        | 54 | Moath Almekhlafi, Mohammed Amir Rais                       |
| Guyana       | 53 | Reshon Hadmon, Anasonye Emmanuel, Gaurang Bhatt            |
| Qatar        | 52 | Yosra Magdi Makki, Faisal Nawaz                            |
| Tunisia      | 52 | Mohammed Amir Rais                                         |
| Burundi      | 51 | Gaurang Bhatt, Rodrigue Ndabashinze                        |
| Palestine    | 51 | Hussein Dawoud, Mohammed Amir Rais                         |
| Greece       | 50 | Dimitrios Kantas, Christos Tsagkaris, Faisal Nawaz         |
| Haiti        | 50 | Daniella Myriam Pierre, Rahul Kashyap                      |
| Turkey       | 50 | Zeynep Pelin Orhan, Faisal Nawaz, Akshat Banga, Usama Oguz |
| Brazil       | 49 | Rahul Kashyap, Jorge Salluh                                |
| Mexico       | 49 | Tanya Amal                                                 |
| Kenya        | 44 | Hafeez Hamza                                               |
| Colombia     | 40 | Gaurang Bhatt, Hedys Selene Ordóñez Mogollón               |
| Croatia      | 40 | Tanja Kovacevic, Rahul Kashyap                             |
| Rwanda       | 35 | Ramesha Remy, Gaurang Bhatt                                |
| South Africa | 35 | Hassan Dawood Alli, Aisha Khalid                           |
| Serbia       | 33 | Marija Vukoja, Srdjan Gavrilovic                           |

|                        |    |                                                                 |
|------------------------|----|-----------------------------------------------------------------|
| Poland                 | 32 | Alicja Rydzewska-Rosolowska, Umme Faisal, Alisha Lakhani        |
| Dominican Republic     | 31 | Franz Lopez, Tanya Amal                                         |
| Grenada                | 31 | Reshon Hadmon                                                   |
| China                  | 27 | Dattatreya Mukherjee, Alisha Lakhani                            |
| El Salvador            | 27 | Salem Ramirez, Kelly Meza                                       |
| Cuba                   | 26 | Lisdamys Morera Gonzalez, Kelly Meza                            |
| Georgia                | 26 | Joanna Lee                                                      |
| Germany                | 25 | L V Simhachalam Kutikuppala                                     |
| Iraq                   | 25 | Mohammed Alkawak                                                |
| Bolivia                | 24 | Marco Antonio Herrera Del Villar, Kelly Maza                    |
| New Zealand            | 23 | Aisha Khalid                                                    |
| Iran                   | 22 | Joanna Lee, L V Simhachalam Kutikuppala, Tanya Amal             |
| UK                     | 19 | Priyadarshini Bhattacharjee, Aisha Khalid, Dattatreya Mukherjee |
| Russia                 | 18 | L V Simhachalam Kutikuppala, Alisha Lakhani                     |
| Bosnia and Herzegovina | 17 | Marija Vukoja, Srdjan Gavrilovic                                |
| Lebanon                | 17 | Mariam Elsaban                                                  |
| Canada                 | 14 | Akshat Banga, Aisha Khalid                                      |
| Sri Lanka              | 14 | L V Simhachalam Kutikuppala                                     |
| Trinidad and Tobago    | 14 | Reshon Hadmon, Umme Faisal                                      |
| Kyrgyzstan             | 13 | L V Simhachalam Kutikuppala                                     |
| Malaysia               | 13 | L V Simhachalam Kutikuppala                                     |
| Ukraine                | 13 | L V Simhachalam Kutikuppala                                     |
| Jamaica                | 12 | Reshon Hadmon, Umme Faisal                                      |
| Switzerland            | 12 | L V Simhachalam Kutikuppala                                     |
| Thailand               | 12 | L V Simhachalam Kutikuppala                                     |
| Hungary                | 11 | Shehu Bledi, Jonida Naska                                       |
| Japan                  | 11 | Joanna Lee                                                      |
