# Supplementary material for: ViSHWaS: Violence Study of Healthcare Workers and Systems—a global survey
Source: PubMed Central journal article supplement — BMJ Glob Health. 2023 Sep 11;8(9):e013101. doi: 10.1136/bmjgh-2023-013101 (PMC10496720; doi:10.1136/bmjgh-2023-013101), 2023-09-11
Supplement: bmjgh-2023-013101supp002.pdf [file bmjgh-2023-013101supp002.pdf]

## Appendix B

Appendix B - Figure 1: Country Demographics of Survey Respondents (79 countries)

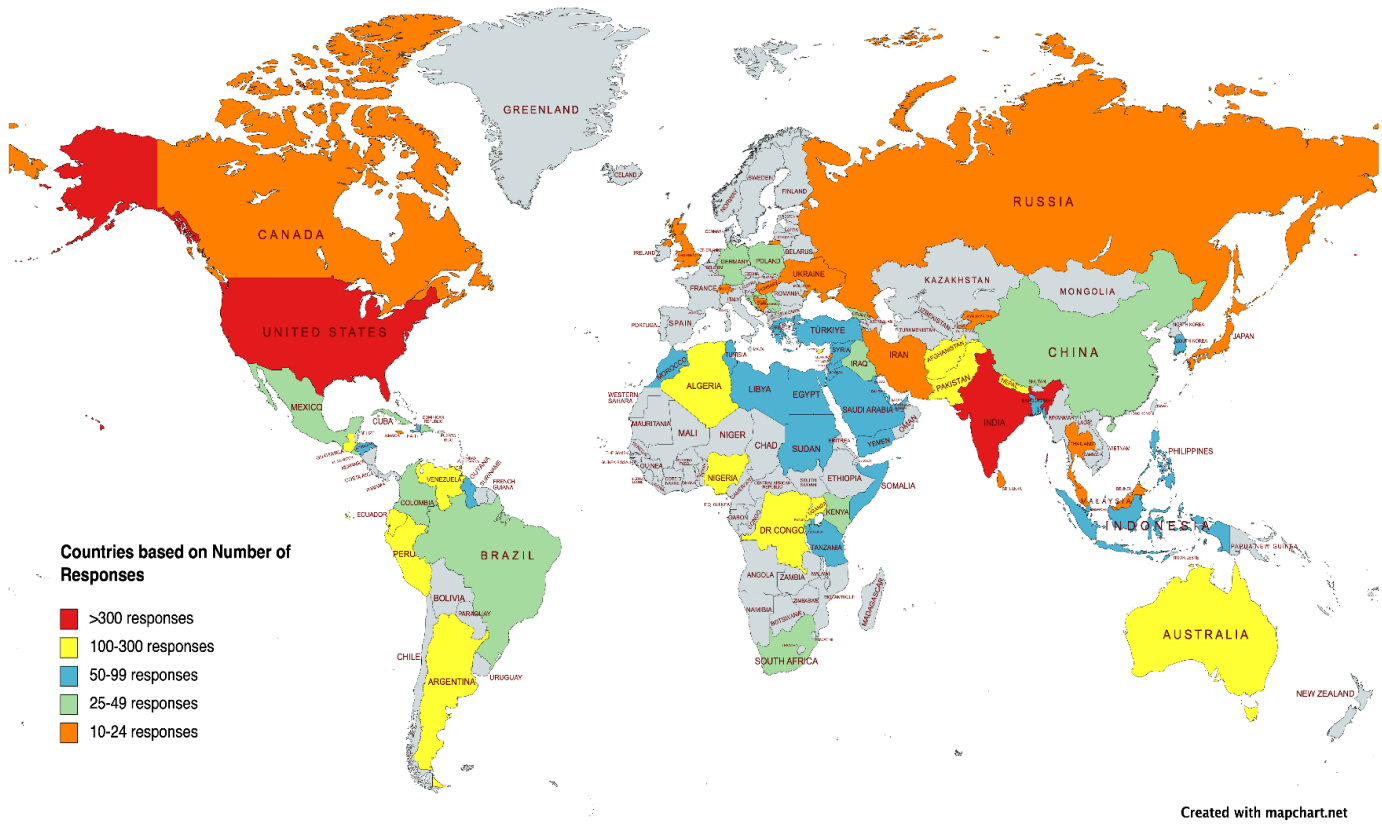

**Appendix B - Figure 2: Country Demographics of Survey Respondents (Top 10 countries)**

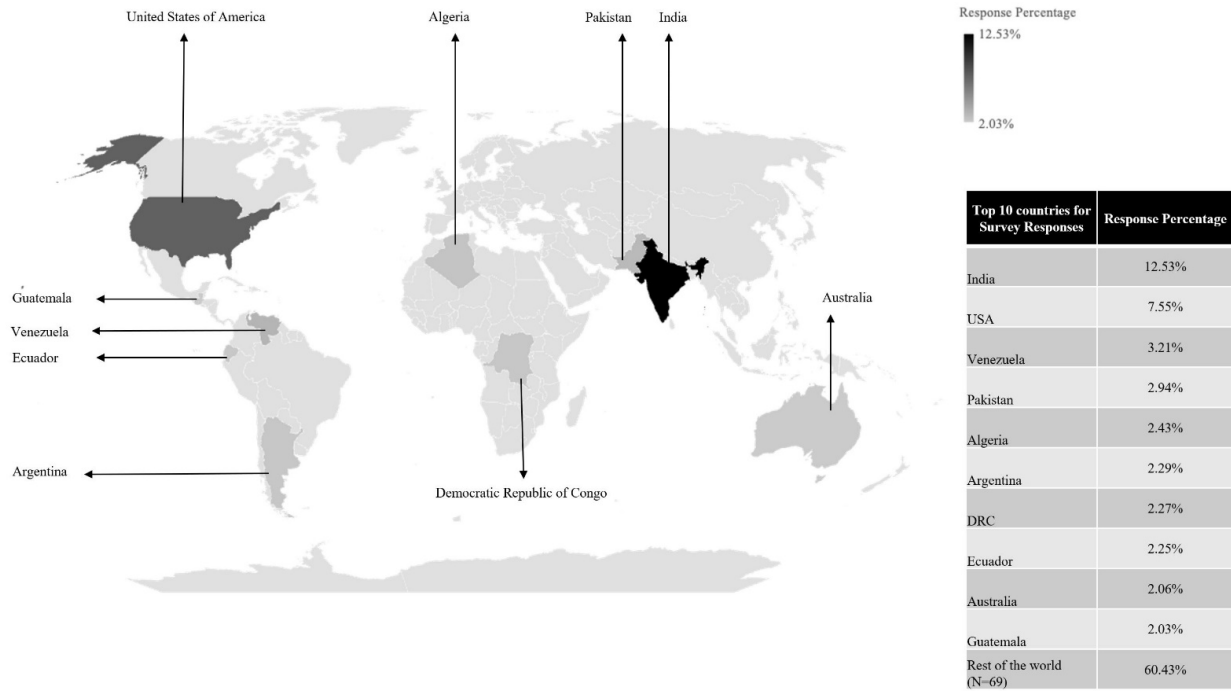

**Appendix B - Figure 3: Hierarchical Representation of The Form of Violence Faced by Survey Respondent – Self v/s Colleague**

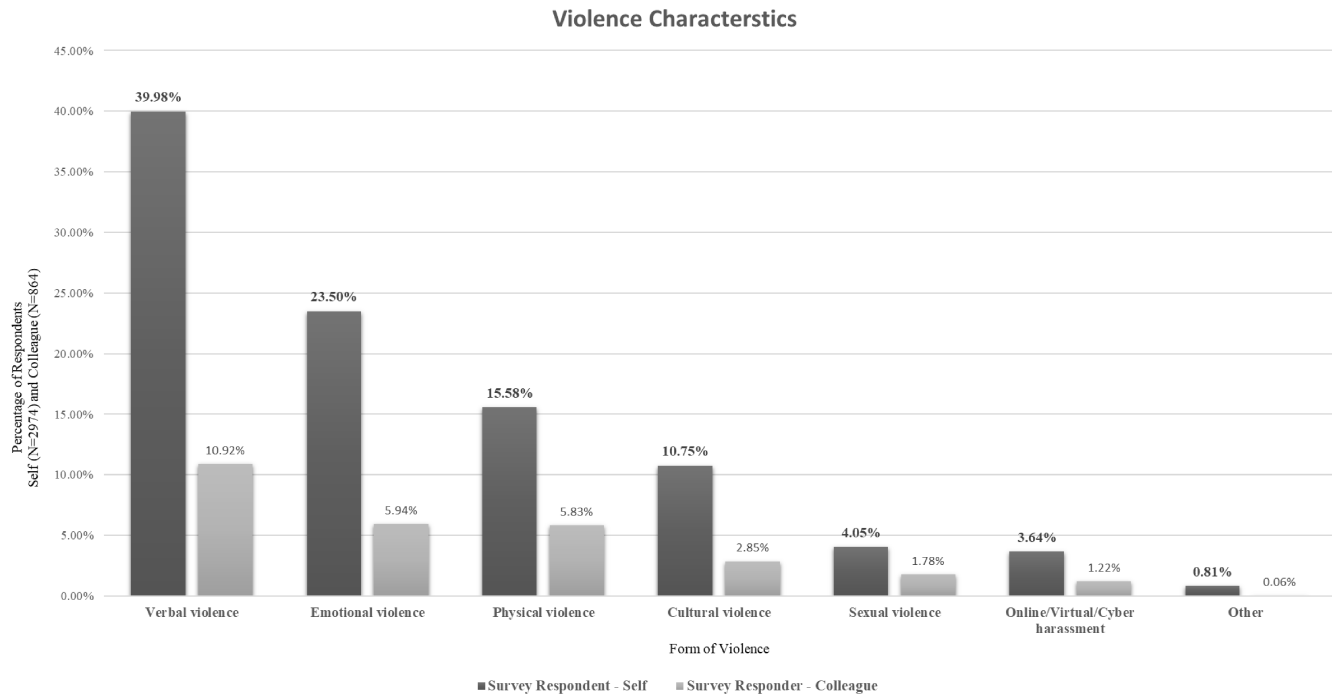

**Appendix B - Figure 4: Worry v/s Preparedness towards a Violent Situation as per Survey Responses – Self + Colleague**

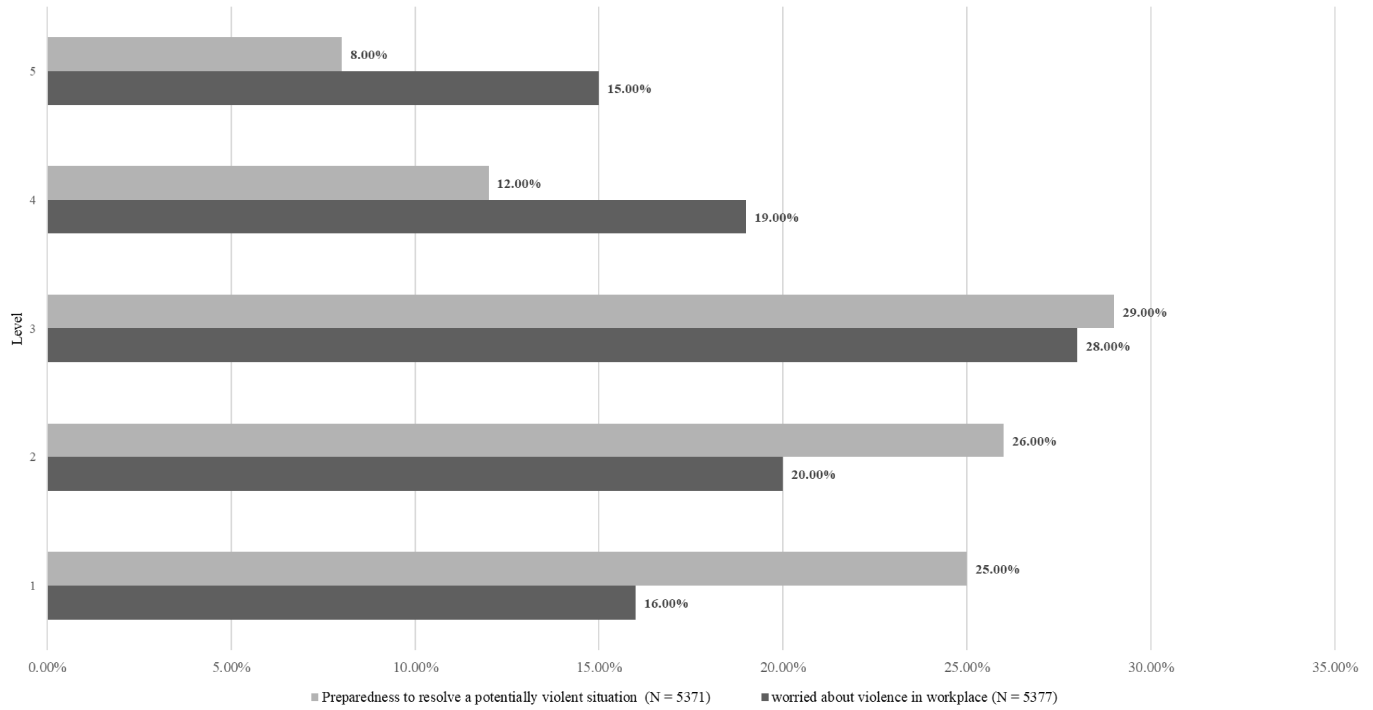

**Appendix B - Figure 5: Change in Perspective Towards Profession as per Survey Responses – Self + Colleague**

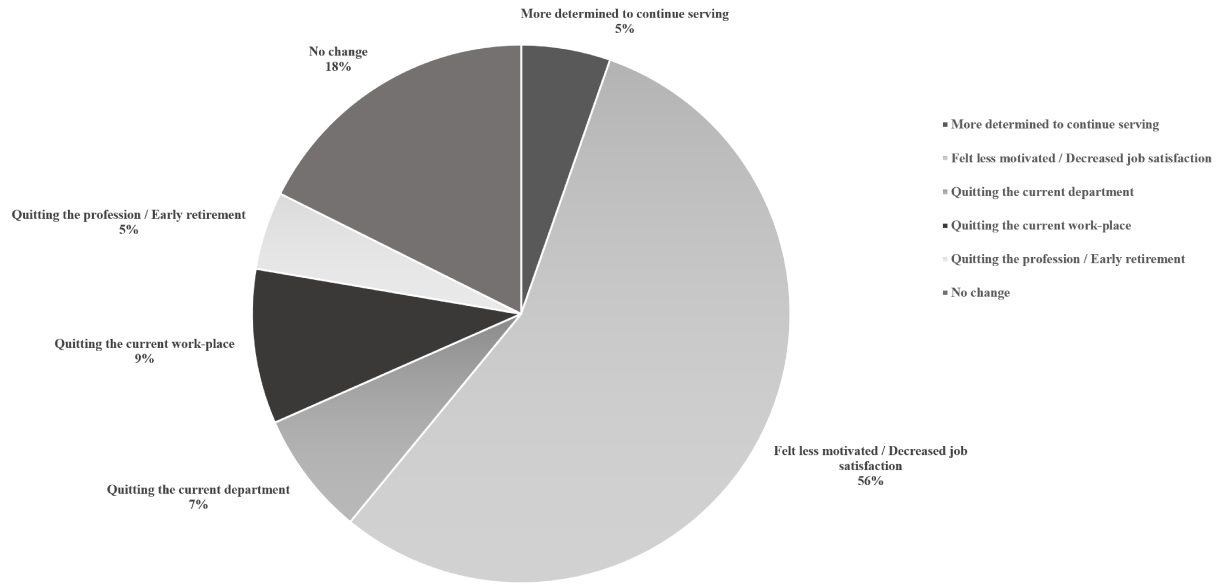

**Appendix B - Table 1: Country Demographics of Survey Respondents (79 countries)**

| Country Name                 | Count (N=5405) | Percentage |
|------------------------------|----------------|------------|
| Afghanistan                  | 100            | 1.85%      |
| Algeria                      | 127            | 2.35%      |
| Argentina                    | 120            | 2.22%      |
| Australia                    | 108            | 2.00%      |
| Bahrain                      | 56             | 1.04%      |
| Bangladesh                   | 76             | 1.41%      |
| Bolivia                      | 24             | 0.44%      |
| Bosnia and Herzegovina       | 17             | 0.31%      |
| Brazil                       | 49             | 0.91%      |
| Burundi                      | 51             | 0.94%      |
| Canada                       | 14             | 0.26%      |
| China                        | 27             | 0.50%      |
| Colombia                     | 40             | 0.74%      |
| Croatia                      | 40             | 0.74%      |
| Cuba                         | 26             | 0.48%      |
| Cyprus                       | 101            | 1.87%      |
| Democratic republic of Congo | 119            | 2.20%      |
| Dominica                     | 61             | 1.13%      |
| Dominican Republic           | 31             | 0.57%      |
| Ecuador                      | 118            | 2.18%      |
| Egypt                        | 76             | 1.41%      |
| El Salvador                  | 27             | 0.50%      |
| Georgia                      | 26             | 0.48%      |
| Germany                      | 25             | 0.46%      |
| Greece                       | 50             | 0.93%      |
| Grenada                      | 31             | 0.57%      |
| Guatemala                    | 106            | 1.96%      |

|             |     |        |
|-------------|-----|--------|
| Guyana      | 53  | 0.98%  |
| Haiti       | 50  | 0.93%  |
| Honduras    | 78  | 1.44%  |
| Hungary     | 11  | 0.20%  |
| India       | 656 | 12.14% |
| Indonesia   | 69  | 1.28%  |
| Iran        | 22  | 0.41%  |
| Iraq        | 25  | 0.46%  |
| Jamaica     | 12  | 0.22%  |
| Japan       | 11  | 0.20%  |
| Jordan      | 75  | 1.39%  |
| Kenya       | 44  | 0.81%  |
| Kuwait      | 59  | 1.09%  |
| Kyrgyzstan  | 13  | 0.24%  |
| Lebanon     | 17  | 0.31%  |
| Libya       | 54  | 1.00%  |
| Malaysia    | 13  | 0.24%  |
| Mexico      | 49  | 0.91%  |
| Morocco     | 65  | 1.20%  |
| Nepal       | 102 | 1.89%  |
| New Zealand | 23  | 0.43%  |
| Nigeria     | 104 | 1.92%  |
| Pakistan    | 154 | 2.85%  |
| Palestine   | 51  | 0.94%  |
| Peru        | 106 | 1.96%  |
| Philippines | 61  | 1.13%  |
| Poland      | 32  | 0.59%  |
| Qatar       | 52  | 0.96%  |
| Russia      | 18  | 0.33%  |

|                     |     |       |
|---------------------|-----|-------|
| Rwanda              | 35  | 0.65% |
| Saudi Arabia        | 88  | 1.63% |
| Serbia              | 33  | 0.61% |
| Singapore           | 55  | 1.02% |
| Somalia             | 56  | 1.04% |
| South Africa        | 35  | 0.65% |
| South Korea         | 78  | 1.44% |
| Sri Lanka           | 14  | 0.26% |
| Sudan               | 67  | 1.24% |
| Switzerland         | 12  | 0.22% |
| Syria               | 59  | 1.09% |
| Tanzania            | 56  | 1.04% |
| Thailand            | 12  | 0.22% |
| Trinidad and Tobago | 14  | 0.26% |
| Tunisia             | 52  | 0.96% |
| Turkey              | 50  | 0.93% |
| UAE                 | 54  | 1.00% |
| Uganda              | 103 | 1.91% |
| UK                  | 19  | 0.35% |
| Ukraine             | 13  | 0.24% |
| USA                 | 395 | 7.31% |
| Venezuela           | 168 | 3.11% |
| Yemen               | 54  | 1.00% |
| Skipped             | 158 | 2.92% |



**Appendix B - Table 2: Country Demographics of Survey Respondents (Top 10 countries)**

| Country Name - Top 10        | Count (N=5405) | Percentage |
|------------------------------|----------------|------------|
| India                        | 656            | 12.14%     |
| USA                          | 395            | 7.31%      |
| Venezuela                    | 168            | 3.11%      |
| Pakistan                     | 154            | 2.85%      |
| Algeria                      | 127            | 2.35%      |
| Argentina                    | 120            | 2.22%      |
| Democratic republic of Congo | 119            | 2.20%      |
| Ecuador                      | 118            | 2.18%      |
| Australia                    | 108            | 2.00%      |
| Guatemala                    | 106            | 1.96%      |
| Rest of the world (N=69)     | 3176           | 58.76%     |
| Skipped                      | 158            | 2.92%      |

**Appendix B - Table 3: Violence outcomes and reporting**

| <b>Results</b>                                                 | <b>Yes Response (N)</b> | <b>Percentage</b> |
|----------------------------------------------------------------|-------------------------|-------------------|
| Violence Reported to Administration/Hospital/Police (N=3838)   | 1862                    | 49%               |
| Available Violence Reporting Procedures at Hospital (N=5405)   | 2795                    | 52%               |
| Awareness of Occupational Safety and Health standards (N=5405) | 2380                    | 44%               |
| Training in Violence Management (N=5405)                       | 1333                    | 25%               |
| <b>Effect of violence on perception of career</b>              | <b>Count (N=3838)</b>   | <b>Percentage</b> |
| More determined to continue serving                            | 204                     | 5%                |
| Felt less motivated/Decreased job satisfaction                 | 2115                    | 55%               |
| Quitting the current department                                | 283                     | 7%                |
| Quitting the current workplace                                 | 354                     | 9%                |
| Quitting the profession/Early retirement                       | 178                     | 5%                |
| No change                                                      | 671                     | 17%               |

**Appendix B - Table 4: Comparison of frequencies of violence subtypes between males and females**

| Type of Violence   |     | Gender |            |        |            | p-Value |
|--------------------|-----|--------|------------|--------|------------|---------|
|                    |     | Male   |            | Female |            |         |
|                    |     | Count  | Percentage | Count  | Percentage |         |
| Verbal Violence    | No  | 1189   | 48.99%     | 1410   | 49.16%     | 0.900   |
|                    | Yes | 1238   | 51.01%     | 1458   | 50.84%     |         |
| Emotional Violence | No  | 1747   | 71.98%     | 1991   | 69.42%     | 0.042   |
|                    | Yes | 680    | 28.02%     | 877    | 30.58%     |         |
| Physical Violence  | No  | 1840   | 75.81%     | 2322   | 80.96%     | 0.001   |
|                    | Yes | 587    | 24.19%     | 546    | 19.04%     |         |
| Sexual Violence    | No  | 2335   | 96.21%     | 2656   | 92.61%     | 0.001   |
|                    | Yes | 92     | 3.79%      | 212    | 7.39%      |         |
