# Supplementary material for: ViSHWaS: Violence Study of Healthcare Workers and Systems—a global survey
Source: PubMed Central journal article supplement — BMJ Glob Health. 2023 Sep 11;8(9):e013101. doi: 10.1136/bmjgh-2023-013101 (PMC10496720; doi:10.1136/bmjgh-2023-013101), 2023-09-11
Supplement: bmjgh-2023-013101supp003.pdf [file bmjgh-2023-013101supp003.pdf]

### CRediT Authorship Statement

The roles of all the authors are listed in the table below. The list has been created using the relevant category terminology provided by Elsevier on their CRediT authorship Statement webpage (<https://www.elsevier.com/authors/policies-and-guidelines/credit-author-statement>).

| AUTHOR NAME                       | CONTRIBUTION                                                                                                                       |
|-----------------------------------|------------------------------------------------------------------------------------------------------------------------------------|
| Akshat Banga, MBBS                | Conceptualization, Methodology, Validation, Formal analysis, Investigation, Data Curation, Writing - Original Draft, Visualization |
| Hans Mautong, MD                  | Methodology, Validation, Investigation, Writing - Review & Editing                                                                 |
| Razan Alamoudi, PharmD            | Validation, Investigation, Writing - Original Draft                                                                                |
| Umme Habiba Faisal, MBBS          | Validation, Investigation, Writing - Original Draft                                                                                |
| Gaurang Bhatt, MBBS               | Validation, Investigation, Writing - Review & Editing                                                                              |
| Tanya Amal, MBBS                  | Validation, Investigation, Writing - Original Draft                                                                                |
| Ayushi Mendiratta, MBBS           | Validation, Investigation, Writing - Original Draft                                                                                |
| Bhaswanth Bollu, MBBS             | Conceptualization, Writing - Review & Editing                                                                                      |
| L V Simhachalam Kutikuppala, MBBS | Investigation, Writing - Original Draft                                                                                            |
| Joanna Lee, MD                    | Investigation, Writing - Original Draft                                                                                            |
| Daniel Martin Simadibrata, MD     | Investigation, Writing - Original Draft                                                                                            |
| Ivan Huespe MD                    | Formal analysis, Investigation, Writing - Original Draft                                                                           |
| Aisha Khalid, MD                  | Validation, Investigation, Writing - Review & Editing                                                                              |
| Mohammed Amir Rais, DMD           | Investigation, Writing - Review & Editing                                                                                          |
| Ramesh Adhikari, MD               | Investigation, Writing - Review & Editing                                                                                          |
| Alisha Lakhani, MBBS              | Investigation, Writing - Review & Editing                                                                                          |
| Piyush Garg, MBBS                 | Investigation, Writing - Review & Editing                                                                                          |
| Harsha Pattnaik, MBBS             | Investigation, Writing - Review & Editing                                                                                          |
| Raghu Gandhi, MD                  | Investigation, Writing - Review & Editing                                                                                          |
| Ramesh Pandit, MD                 | Investigation, Writing - Review & Editing                                                                                          |
| Faizan Ahmad, M.Phil              | Investigation, Writing - Review & Editing                                                                                          |
| Genesis Camacho-Leon, MD          | Investigation, Writing - Review & Editing                                                                                          |
| Pierre N Ciza, MD                 | Investigation, Writing - Review & Editing                                                                                          |
| Nimsi Barrios, MD                 | Investigation, Writing - Review & Editing                                                                                          |
| Kelly Meza, MD                    | Investigation, Writing - Review & Editing                                                                                          |

|                         |                                                                                                                                                           |
|-------------------------|-----------------------------------------------------------------------------------------------------------------------------------------------------------|
| Susan Okonkwo, MD       | Investigation, Writing - Review & Editing                                                                                                                 |
| Amuza Dhabuliwo, MBChB  | Investigation, Writing - Review & Editing                                                                                                                 |
| Hafeez Hamza, MPharm    | Investigation, Writing - Review & Editing                                                                                                                 |
| Arash Nemat, MD         | Investigation, Writing - Review & Editing                                                                                                                 |
| Mohammad Yasir Essar    | Methodology, Investigation, Writing - Review & Editing                                                                                                    |
| Anne Kampa              | Writing - Review & Editing                                                                                                                                |
| Rakhtan K. Qasba, MBBS  | Methodology, Investigation, Writing - Review & Editing                                                                                                    |
| Pranjal Sharma, MD      | Investigation, Writing - Review & Editing                                                                                                                 |
| Taru Dutt, MD           | Investigation, Writing - Review & Editing                                                                                                                 |
| Pratikkumar Vekaria, MD | Investigation, Writing - Review & Editing                                                                                                                 |
| Vikas Bansal, MBBS      | Investigation, Writing - Review & Editing                                                                                                                 |
| Faisal A. Nawaz, MBBS   | Conceptualization, Validation, Investigation, Writing - Review & Editing, Supervision                                                                     |
| Salim Surani, MD        | Validation, Investigation, Writing - Review & Editing                                                                                                     |
| Rahul Kashyap, MBBS     | Conceptualization, Methodology, Validation<br>Formal analysis, Investigation, Data Curation,<br>Writing - Review & Editing, Visualization,<br>Supervision |

Corresponding Author,

Rahul Kashyap, MBBS, MBA,

Medical Director Research, WellSpan Health,

1001 S George St, York, PA 17403, USA,

kashyapmd@gmail.com
